# Supplementary material
Source: PubMed Central journal article supplement (PMC2801751)
Supplement: mmc1.pdf [file mmc1.pdf]

## Loss-of-Function Mutations in the *PRPS1* Gene

### Cause a Type of Nonsyndromic X-linked

### Sensorineural Deafness, DFN2

Xuezhong Liu, Dongyi Han, Jianzhong Li, Bing Han, Xiaomei Ouyang, Jing Cheng, Xu Li, Zhanguo Jin, Youqin Wang, Maria Bitner-Glindzicz, Xiangyin Kong, Heng Xu, Albena Kantardzhieva, Roland D Eavey, Christine E Seidman, Jonathan G Seidman, Li L. Du, Zheng-Yi Chen, Pu Dai, Maikun Teng, Denise Yan, and Huijun Yuan

Table S1. LOD Scores Reflecting Linkage between Chromosome X Markers and Locus of Inherited Hearing Loss in Family GZ-Z052

| Marker  | Two-point LOD score at $\theta =$ |             |             |             |             |             |             |
|---------|-----------------------------------|-------------|-------------|-------------|-------------|-------------|-------------|
|         | 0.00                              | 0.01        | 0.05        | 0.1         | 0.2         | 0.3         | 0.4         |
| DXS8020 | -2.42                             | -0.40       | 0.29        | 0.55        | 0.68        | 0.58        | 0.35        |
| DXS8096 | <b>4.25</b>                       | <b>4.19</b> | <b>3.93</b> | <b>3.58</b> | <b>2.81</b> | <b>1.96</b> | <b>1.02</b> |
| DXS1106 | 2.45                              | 2.41        | 2.24        | 2.02        | 1.56        | 1.07        | 0.55        |
| DXS1210 | 1.50                              | 1.47        | 1.38        | 1.25        | 0.96        | 0.64        | 0.31        |
| DXS1059 | 1.37                              | 1.34        | 1.24        | 1.11        | 0.84        | 0.55        | 0.27        |
| DXS8088 | 0.46                              | 0.45        | 0.41        | 0.35        | 0.23        | 0.12        | 0.03        |
| DXS8055 | -5.29                             | -1.25       | -0.44       | -0.07       | 0.20        | 0.24        | 0.16        |

Table S2. Expression Profiling of PRPS1 Identified by Quantitative Real-Time RT-PCR

| <b>Individual</b>                    | <b>Sex</b> | <b>Mutation Carrier</b> | <b><math>\Delta C(t) = C(t)PRPS1 - C(t)\beta-ACTIN</math></b> |
|--------------------------------------|------------|-------------------------|---------------------------------------------------------------|
| Affected males:                      |            |                         |                                                               |
| IV-1                                 | M          | Y                       | 6.53                                                          |
| IV-34                                | M          | Y                       | 6.28                                                          |
| IV-36                                | M          | Y                       | 6.06                                                          |
| IV-9                                 | M          | Y                       | 6.45                                                          |
| <b>Average</b>                       |            |                         | <b>6.33</b>                                                   |
| Female carriers:                     |            |                         |                                                               |
| III-27                               | F          | Y                       | 6.54                                                          |
| III-29                               | F          | Y                       | 6.32                                                          |
| <b>Average</b>                       |            |                         | <b>6.43</b>                                                   |
| Unaffected male and normal controls: |            |                         |                                                               |
| IV-5                                 | M          | N                       | 5.71                                                          |
| IV-7                                 | M          | N                       | 6.61                                                          |
| C-1                                  | M          | N                       | 6.57                                                          |
| C-2                                  | M          | N                       | 6.38                                                          |
| <b>Average</b>                       |            |                         | <b>6.32</b>                                                   |
